# Supplementary material for: A method for synthesizing ZnO–carbonaceous species nanocomposites, and their conversion to quasi-single crystal mesoporous ZnO nanostructures
Source: Royal Society of Chemistry journal article supplement (doi:10.1039/c1ra00661d), 2011-11-17
Supplement: c1ra00661d.pdf [file c1ra00661d.pdf]

## Electronic Supplementary Information (ESI)

### **A method for synthesizing ZnO-carbonaceous species nanocomposites, and their conversion to quasi-single crystal mesoporous ZnO nanostructures**

Seungho Cho, Ji-Wook Jang, Hyun Jin Park, Dae-Won Jung, Alum Jung, Jae Sung Lee and Kun-Hong Lee\*

Department of Chemical Engineering and National Center for Nanomaterials Technology (NCNT), Pohang University of Science and Technology (POSTECH), San 31, Hyoja-Dong, Nam-Gu, Pohang, Gyungbuk, Korea, 790-784

\*Corresponding author: E-mail: ce20047@postech.ac.kr

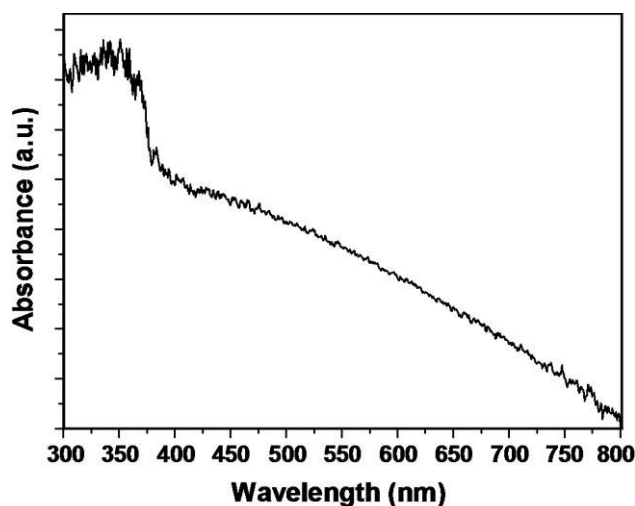

**Figure S1.** UV-vis absorption spectrum of powders synthesized from the reaction of an aqueous solution containing 0.01 M zinc nitrate hexahydrate, 0.01 M HMT, and 0.002 M L(+)-ascorbic acid at 180°C for 30 min.

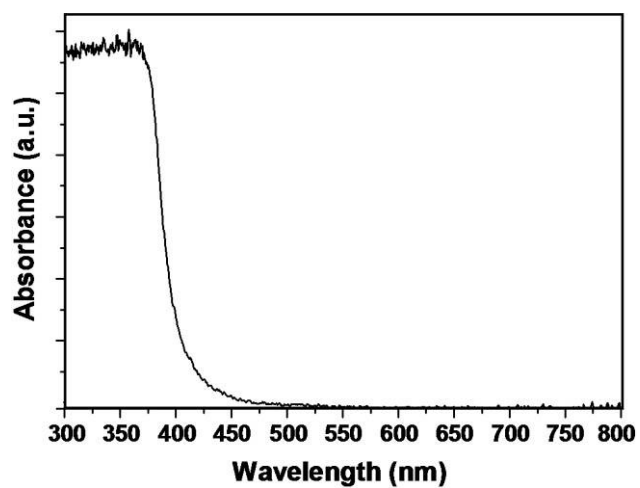

**Figure S2.** UV-vis absorption spectrum of the powder obtained by calcination of as-prepared ZnO-carbonaceous species nanocomposites at 600°C for 2 h in air.
